# Supplementary material for: Optically Transparent Vertical Silicon Nanowire Arrays for Live-Cell Imaging
Source: Research Square preprint supplement (doi:10.21203/rs.3.rs-138271/v2), 2021-02-09
Supplement: Supplementary file 1 [file c3131f05410b9c667535de0c.docx]

Novel experimental approach enabling harvesting of vertically configured SiNWs from a Si-donor substrate and their subsequent transfer onto the acceptor transparent glass substrate with minimal artifacts and their subsequent compatibility with live-cell phase-contrast imaging.

Roey Elnathan†, Andrew W. Holle†, Jennifer Young†, Marina A. George, Omri Heifler, Andriy Goychuk, Erwin Frey, Ralf Kemkemer, Joachim P. Spatz, Alon Kosloff*, Fernando Patolsky*, and Nicolas H. Voelcker*

**
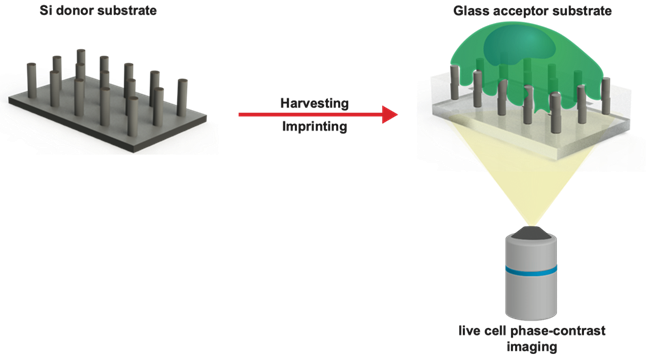
Optically Transparent Vertical Silicon Nanowire Arrays for Live-Cell Imaging**
